# Supplementary material for: Robotic versus laparoscopic ventral hernia repair: multicenter, blinded randomized controlled trial
Source: PubMed Central journal article supplement — BMJ. 2020 Jul 14;370:m2457. doi: 10.1136/bmj.m2457 (PMC7359869; doi:10.1136/bmj.m2457), 2020-07-14
Supplement: olao052670.ww1.pdf [file olao052670.ww1.pdf]

**Supplementary table A. Common and individual standardized steps for ventral hernia repair**

| RVHR                                                                                                                                                                     | LVHR                                                                                                                |
|--------------------------------------------------------------------------------------------------------------------------------------------------------------------------|---------------------------------------------------------------------------------------------------------------------|
| Abdomen was entered in the right or left upper abdominal quadrant with an optical trocar                                                                                 |                                                                                                                     |
| Pneumoperitoneum was created insufflating the abdomen with CO <sub>2</sub> at an intraabdominal pressure of 10-15mmHg                                                    |                                                                                                                     |
| Two 8mm and one 12mm ports were placed along the lateral abdominal wall                                                                                                  | One or two 5mm ports were placed along lateral abdominal wall and a 12mm port was placed through the fascial defect |
| Anterior abdominal wall adhesions were taken down with robotic scissor and grasper                                                                                       | Anterior abdominal wall adhesions were taken down with laparoscopic scissor or vessel sealer device                 |
| Fascial defect was closed with locking barbed 0-polydioxanone sutures                                                                                                    | Fascial defect was closed with conventional 0-polydioxanone sutures                                                 |
| Mid-density hydrogel adhesion-barrier coated polypropylene mesh was inserted through a 12mm port. Mesh size was selected to provide at least 5cm of overlap in all sides |                                                                                                                     |
| Mesh was secured with circumferential running locking barbed 2-0 polydioxanone sutures                                                                                   | Mesh was secured with transfascial sutures and circumferential double crown of permanent tacks                      |
| Skin was closed with absorbable sutures and dressed with cyanoacrylate glue                                                                                              |                                                                                                                     |

RVHR: Robotic ventral hernia repair, LVHR: Laparoscopic ventral hernia repair

**Supplementary table B. Enhanced recovery after surgery protocol utilized for our study**

|                           |                                                                                                                                                                                                                                                                                                                                                                                                                                                                                                                                                                                                                                                  |
|---------------------------|--------------------------------------------------------------------------------------------------------------------------------------------------------------------------------------------------------------------------------------------------------------------------------------------------------------------------------------------------------------------------------------------------------------------------------------------------------------------------------------------------------------------------------------------------------------------------------------------------------------------------------------------------|
| Pre-operative management  | <p>Prehabilitation programs: diet and exercise to encourage pre-operative weight loss<br/> Smoking cessation for at least 4 weeks prior to surgery<br/> Optimization of hemoglobin A1c in diabetic patients<br/> Pre-operative chlorhexidine baths</p>                                                                                                                                                                                                                                                                                                                                                                                           |
| Peri-operative management | <ul style="list-style-type: none"> <li>● Regional anesthesia: intraoperative transversus abdominis plane (TAP) block</li> <li>● Prophylaxis for deep venous thrombosis: use of sequential compression devices (SCDs) and/or pharmacologic prophylaxis with unfractionated or low-molecular-weight heparin</li> <li>● Fluid balance: judicious intraoperative fluid administration for a goal of zero balance</li> <li>● Intraoperative glycemic control</li> <li>● Temperature control to maintain euthermia</li> <li>● Prevention of urinary retention: use of Tamsulosin for patients at high risk for developing urinary retention</li> </ul> |
| Post-operative management | <ul style="list-style-type: none"> <li>● Multimodal analgesic regimen: included acetaminophen, non-steroidal anti-inflammatory drugs (e.g. ibuprofen or naproxen), gabapentinoids (e.g. gabapentin or pregabalin), and limited narcotics (e.g. tramadol or oxycodone)</li> <li>● Early ambulation</li> <li>● Immediate post-operative resumption of normal diet</li> </ul>                                                                                                                                                                                                                                                                       |

**Supplementary table C: Reasons for prolonged post-operative length of stay and readmissions**

|                               | Group | Reason                                                                                                                                                                                                                                                                                 | Number of days                                         |
|-------------------------------|-------|----------------------------------------------------------------------------------------------------------------------------------------------------------------------------------------------------------------------------------------------------------------------------------------|--------------------------------------------------------|
| <b>Hospital LOS &gt;1 day</b> | RVHR  | 8 Patients: Pain management<br>1 Patient: Extensive lysis of adhesions<br>1 Patient: Increased oxygen requirement<br>1 Patient: Acute kidney injury<br>1 Patient: Late completion of case<br>2 Patients: Enterotomies                                                                  | 10 days<br>1 day<br>1 day<br>4 days<br>1 day<br>5 days |
|                               | LVHR  | 3 Patients: Pain management<br>1 Patient: Extensive lysis of adhesions<br>1 Patient: Increased oxygen requirement<br>1 Patient: Acute kidney injury + hematoma requiring transfusion + post-operative ileus<br>1 Patient: Multiple comorbidities<br>1 Patient: Decreased ostomy output | 4 days<br>2 days<br>1 day<br>7 days<br>1 day<br>3 days |
| <b>Readmission</b>            | RVHR  | 1 Patient: Post-operative ileus                                                                                                                                                                                                                                                        | 2 days                                                 |
|                               | LVHR  | 1 Patient: Post-operative ileus<br>1 Patient: Surgical drainage of seroma<br>1 Patient: Uncontrolled post-operative pain                                                                                                                                                               | 1 days<br>2 days<br>3 days                             |

LOS: Length of stay, RVHR: Robotic ventral hernia repair, LVHR: Laparoscopic ventral hernia repair

**Supplementary table D1: Univariable subgroup analysis of operating room time in minutes**

| Characteristics                     | RVHR<br>N=65 | LVHR<br>N=58 | P-value |
|-------------------------------------|--------------|--------------|---------|
| <b>Hernia Type, mean (SD)</b>       |              |              |         |
| Primary (N=23)                      | 127 (74)     | 62 (28)      | 0.606   |
| Incisional (N=78)                   | 144 (57)     | 78 (40)      |         |
| Recurrent (N=22)                    | 135 (30)     | 91 (36)      |         |
| <b>Hernia Area, mean (SD)</b>       |              |              |         |
| Small (<20cm <sup>2</sup> ) (N=79)  | 118 (40)     | 65 (28)      | 0.387   |
| Medium (>20cm <sup>2</sup> ) (N=44) | 173 (60)     | 107 (40)     |         |
| <b>Surgeon, mean (SD)</b>           |              |              |         |
| Surgeon #1 (N=51)                   | 155 (48)     | 75 (38)      | 0.073   |
| Surgeon #2 (N=50)                   | 135 (66)     | 73 (40)      |         |
| Surgeon #3 (N=22)                   | 118 (49)     | 93 (26)      |         |

RVHR: Robotic ventral hernia repair, LVHR: Laparoscopic ventral hernia repair, SD: Standard deviation

**Supplementary table D2: Multivariable subgroup analysis of operating room time in minutes**

| Multivariable Regression <sup>a</sup>      | Mean difference | 95% CI          | P-Value |
|--------------------------------------------|-----------------|-----------------|---------|
| Hernia Type                                |                 |                 |         |
| Primary                                    | Ref             |                 |         |
| Incisional                                 | 10.4            | (-10.7 to 31.4) | 0.337   |
| Recurrent                                  | 5.4             | (-22.0 to 32.8) | 0.700   |
| Hernia Area (minutes per cm <sup>2</sup> ) | 0.3             | (0.2 to 0.4)    | <0.001  |
| Surgeon                                    |                 |                 |         |
| Surgeon #1                                 | Ref             |                 |         |
| Surgeon #2                                 | 2.7             | (-15.7 to 21.2) | 0.771   |
| Surgeon #3                                 | 6.7             | (-16.4 to 29.7) | 0.572   |
| Approach                                   |                 |                 |         |
| Laparoscopic                               | Ref             |                 |         |
| Robotic                                    | 63.4            | (47.5 to 79.3)  | <0.001  |

<sup>a</sup>In this multivariable generalized linear regression, only hernia area and robotic approach were independently associated with increased operative room time

**Supplementary table E1: Univariable subgroup analysis of costs in US Dollars**

| Characteristics                     | RVHR<br>N=65             | LVHR<br>N=58             | P-value |
|-------------------------------------|--------------------------|--------------------------|---------|
| <b>Hernia Type, mean (SD)</b>       |                          |                          |         |
| Primary (N=23)                      | \$14,531.17 (\$5,532.15) | \$11,005.69 (\$4,523.98) | 0.618   |
| Incisional (N=78)                   | \$16,258.08 (\$5,073.05) | \$13,603.78 (\$6,445.20) |         |
| Recurrent (N=22)                    | \$14,789.61 (\$2,469.93) | \$13,698.23 (\$4,671.71) |         |
| <b>Hernia Area, mean (SD)</b>       |                          |                          |         |
| Small (<20cm <sup>2</sup> ) (N=79)  | \$13,842.14 (\$3,511.23) | \$11,070.44 (\$3,635.11) | 0.443   |
| Medium (>20cm <sup>2</sup> ) (N=44) | \$18,711.52 (\$5,162.30) | \$17,498.95 (\$7,005.11) |         |
| <b>Surgeon, mean (SD)</b>           |                          |                          |         |
| Surgeon #1 (N=51)                   | \$17,061.61 (\$4,846.77) | \$14,078.04 (\$7,464.09) | 0.790   |
| Surgeon #2 (N=50)                   | \$14,977.79 (\$4,810.73) | \$11,842.91 (\$4,529.58) |         |
| Surgeon #3 (N=22)                   | \$14,746.54 (\$4,841.50) | \$13,373.75 (\$2,703.45) |         |

RVHR: Robotic ventral hernia repair, LVHR: Laparoscopic ventral hernia repair, SD: Standard deviation

**Supplementary table E2: Multivariable subgroup analysis of costs in US Dollars**

| Multivariable Regression <sup>a</sup> | Mean difference | 95% CI                      | P-value |
|---------------------------------------|-----------------|-----------------------------|---------|
| Hernia Type                           |                 |                             |         |
| Primary                               | Ref             |                             |         |
| Incisional                            | \$1,260.33      | (\$-934.65 to \$3,455.33)   | 0.263   |
| Recurrent                             | \$-584.67       | (\$-3,435.96 to \$2,266.63) | 0.689   |
| Hernia Area (\$ per cm <sup>2</sup> ) | \$36.03         | (\$24.82 to \$47.23)        | <0.001  |
| Surgeon                               |                 |                             |         |
| Surgeon #1                            | Ref             |                             |         |
| Surgeon #2                            | \$-741.61       | (\$-2,661.50 to \$1,178.28) | 0.451   |
| Surgeon #3                            | \$373.87        | (\$-2,025.36 to \$2,773.10) | 0.761   |
| Approach                              |                 |                             |         |
| Laparoscopic                          | Ref             |                             |         |
| Robotic                               | \$2,643.53      | (\$985.71 to \$4,301.35)    | 0.002   |

<sup>a</sup>In this multivariable generalized linear regression, only hernia area and robotic approach were independently associated with increased costs

**Supplementary table F: Change in mAAS scores (raw) per question and questionnaire component**

|                                                                                                           | Change in Score from Baseline, median (IQR) <sup>a</sup> |                   |                  |
|-----------------------------------------------------------------------------------------------------------|----------------------------------------------------------|-------------------|------------------|
|                                                                                                           | RVHR<br>N= 64                                            | LVHR<br>N = 59    | P-value          |
| <b>Psychological well-being</b>                                                                           | <b>0 (-4, 1)</b>                                         | <b>-1 (-5, 0)</b> | <b>0.037</b>     |
| My abdominal wall (your belly) has a huge impact on my health.                                            | -1 (-3, 1)                                               | 0 (-5, 0)         | 0.589            |
| My abdominal wall (your belly) affects how I feel every day.                                              | 0 (-4, 1)                                                | 0 (-5, 1)         | 0.337            |
| I often feel sad because of my abdominal wall (your belly).                                               | 0 (-4, 1)                                                | -2 (-5, 0)        | 0.434            |
| <b>Physical Activity</b>                                                                                  | <b>0 (-3, 1)</b>                                         | <b>0 (-4, 0)</b>  | <b>0.014</b>     |
| My abdominal wall (your belly) causes me physical pain                                                    | -1 (-3, 0)                                               | -1 (-5, 1)        | 0.912            |
| My abdominal wall (your belly) interferes when I perform strenuous activities (eg, heavy lifting)         | -1 (-3, 0)                                               | -1 (-5, 1)        | 0.465            |
| My abdominal wall (your belly) interferes when I perform moderate activities (eg, bowling, bending over). | 0 (-3, 2)                                                | -2 (-4, 0)        | 0.110            |
| My abdominal wall (your belly) interferes when I walk or climb stairs.                                    | 0 (-2, 1)                                                | -1 (-5, 0)        | 0.194            |
| My abdominal wall (your belly) interferes when I dress myself, take showers and cook.                     | 0 (-2, 2)                                                | 0 (-4, 1)         | 0.358            |
| My abdominal wall (your belly) interferes with my sexual activity.                                        | 0 (-1, 1)                                                | 0 (-4, 0)         | 0.784            |
| <b>Social well-being</b>                                                                                  | <b>0 (-1, 2)</b>                                         | <b>0 (-4, 1)</b>  | <b>&lt;0.001</b> |
| I often stay at home because of my abdominal wall (your belly).                                           | 0 (-1, 3)                                                | 0 (-4, 2)         | 0.050            |
| I accomplish less at home because of my abdominal wall (your belly).                                      | 0 (-1, 3)                                                | 0 (-3, 1)         | 0.101            |



|                                                                      |           |            |       |
|----------------------------------------------------------------------|-----------|------------|-------|
| I accomplish less at work because of my abdominal wall (your belly). | 0 (-1, 2) | -1 (-5, 0) | 0.001 |
|----------------------------------------------------------------------|-----------|------------|-------|

mAAS: Modified Activity Assessment Scale, RVHR: Robotic ventral hernia repair, LVHR: Laparoscopic ventral hernia repair, IQR: Interquartile range

<sup>a</sup>Negative number indicates improved function, positive number indicates worsened function

**Supplementary table G: ANCOVA for patient centered outcomes**

| <b>AW-QOL Scores (mAAS)</b> | <b>Mean difference</b> | <b>95% CI</b>    | <b>P-value</b> |
|-----------------------------|------------------------|------------------|----------------|
| Baseline                    | 0.43                   | (0.26 to 0.59)   | <0.001         |
| Surgeon                     |                        |                  |                |
| Surgeon #1                  | Ref                    |                  |                |
| Surgeon #2                  | 1.45                   | (-8.87 to 11.77) | 0.782          |
| Surgeon #3                  | -7.56                  | (-21.00 to 5.89) | 0.268          |
| Approach                    |                        |                  |                |
| Laparoscopic                | Ref                    |                  |                |
| Robotic                     | -9.15                  | (-18.57 to 0.26) | 0.057          |
| <b>Pain Scores (VAS)</b>    | <b>Mean difference</b> | <b>95% CI</b>    | <b>P-value</b> |
| Baseline                    | 0.23                   | (0.07 to 0.38)   | 0.006          |
| Surgeon                     |                        |                  |                |
| Surgeon #1                  | Ref                    |                  |                |
| Surgeon #2                  | 0.77                   | (-0.33 to 1.87)  | 0.168          |
| Surgeon #3                  | 0.75                   | (-0.66 to 2.16)  | 0.245          |
| Approach                    |                        |                  |                |
| Laparoscopic                | Ref                    |                  |                |
| Robotic                     | 0.425                  | (-0.58 to 1.42)  | 0.402          |

AW-QOL: Abdominal wall quality of life, mAAS: Modified Activity Assessment Scale, VAS: Visual analog scale, ANCOVA: Analysis of covariance
